# Supplementary material for: Putrescine enhances intestinal immune function and regulates intestinal bacteria in weaning piglets
Source: Royal Society of Chemistry journal article supplement (doi:10.1039/c9fo00842j), 2019-01-01
Supplement: c9fo00842j1.pdf [file c9fo00842j1.pdf]

## Supplementary material

# Putrescine Enhances Intestinal Immune Function and Regulates Intestinal Bacteria in Weaning Piglets

Guangmang Liu, <sup>\*a,b</sup> Jie Zheng, <sup>a,b</sup> Xianjian Wu, <sup>a,b</sup> Xiaomei Xu, <sup>a,b</sup> Gang Jia, <sup>a,b</sup> Hua Zhao, <sup>a,b</sup> Xiaoling Chen, <sup>a,b</sup> Caimei Wu <sup>\*a,b</sup> and Jing Wang <sup>c</sup>

<sup>a</sup> Institute of Animal Nutrition, Sichuan Agricultural University, Chengdu, Sichuan, China

<sup>b</sup> Key Laboratory for Animal Disease-Resistance Nutrition of China Ministry of Education, Chengdu, Sichuan, China

<sup>c</sup> Maize Research Institute, Sichuan Agricultural University, Chengdu, Sichuan, China

**TABLE S1** | Ingredients and nutrient composition of basal diet (as fed basis) \*

| Ingredients (g/kg) |       |
|--------------------|-------|
| Corn               | 579.5 |
| Soybean meal       | 250   |
| Fish meal          | 50    |
| Dried whey         | 45    |

---

|                             |       |
|-----------------------------|-------|
| Spray-dried plasma protein  | 25    |
| Soybean oil                 | 20    |
| Limestone meal              | 5     |
| Dicalcium phosphate         | 11    |
| Sodium chloride             | 3     |
| L-Lysine HCl                | 1     |
| DL-Methionine               | 0.5   |
| Vitamin-mineral premix†     | 10    |
| Analyzed composition (g/kg) |       |
| Digestible energy (MJ/kg)   | 14.35 |
| Crude protein               | 229.5 |
| Lysine                      | 14.3  |
| Methionine                  | 3.7   |
| Calcium                     | 9.1   |
| Total phosphorus            | 7.2   |

---

\* This formula was provided by NRC (2012)

† Supplied per kilogram of diet: vitamin A, 6,000 IU; vitamin D3, 600 IU; vitamin E, 50 IU; vitamin K3, 1.5 mg; thiamine, 2.0 mg; riboflavin, 8.0

mg; pantothenic acid, 20 mg; niacin, 30 mg; pyridoxine, 3.0 mg; choline, 800 mg; folic acid, 0.6 mg; biotin, 0.10 mg; vitamin B12, 0.04 mg; Zn, 100 mg (ZnSO<sub>4</sub>); Cu, 16 mg (CuSO<sub>4</sub>•5H<sub>2</sub>O); Fe, 125 mg (FeSO<sub>4</sub>); Mn, 15 mg (MnSO<sub>4</sub>•H<sub>2</sub>O); Se, 0.3 mg (Na<sub>2</sub>SeO<sub>3</sub>); I, 0.2 mg (KI).

**TABLE S2** | Primer sequences of the target and reference genes used in Real-time PCR

| Genes   | Primer sequence (5'-3')            | Product (bp) | Annealing temperature (°C) | Accession no.  |
|---------|------------------------------------|--------------|----------------------------|----------------|
| β-Actin | Forward: TGC GGGACATCAAGGAGAA      | 58           | 58                         | DQ452569.1     |
|         | Reverse: GCCATCTCCTGCTCGAAGTC      |              |                            |                |
| TNF-α   | Forward: CGACTCAGTGCCGAGATCAA      | 60           | 58                         | JF831365.1     |
|         | Reverse: GACCTGCCCAGATTCAGCAA      |              |                            |                |
| IL-1β   | Forward: AAGGCCGCCAAGATATAACTGA    | 71           | 58                         | NM_001302388.1 |
|         | Reverse: GCCCTCTGGGTATGGCTTTC      |              |                            |                |
| IL-2    | Forward: GCCATTGCTGCTGGATTTACA     | 68           | 58                         | FJ543109.1     |
|         | Reverse: TGGAGAGATCAGCATTCTCGTAATT |              |                            |                |
| IL-6    | Forward: ATGCTTCCAATCTGGGTTCAA     | 61           | 58                         | AF518322.1     |
|         | Reverse: CACAAGACCGGTGGTGATTCT     |              |                            |                |
| IL-8    | Forward: ACATCCATGAGGAAGACAGTTTGA  | 70           | 58                         | AB057440.1     |

---

|                |                                     |    |    |                |
|----------------|-------------------------------------|----|----|----------------|
|                | Reverse: CGGGAACTCCACGCTAGATTC      |    |    |                |
| IL-10          | Forward: CCACATGCTCCGGGAACT         | 63 | 58 | HQ236499.1     |
|                | Reverse: TCCTTCGTTTGAAAGAAACTCTTCA  |    |    |                |
| IL-12          | Forward: GCCCAGGAATGTTCAAATGC       | 60 | 58 | NM_213993.1    |
|                | Reverse: TGTTGCTGACGGCCTTCAG        |    |    |                |
| IgM            | Forward: TCTGGCAAACACAGCTCATAACA    | 69 | 58 | AB699686.1     |
|                | Reverse: TCGTTGCATCTGCCATTACTG      |    |    |                |
| TGF- $\beta$ 1 | Forward: CGAGCCAGAGGCGGACTAC        | 63 | 58 | NM_214015.1    |
|                | Reverse: TTGCCGCTTTCACCATTA         |    |    |                |
| CD8            | Forward: GACCTCCGGCATCCTTCTC        | 54 | 58 | AB634502.1     |
|                | Reverse: CGGCGGTGGCAGATGA           |    |    |                |
| CD11           | Forward: CCGGATGTTCTGCTGAATAATG     | 64 | 58 | NM_001044608.1 |
|                | Reverse: CGATGGCACCAAAGGTGTT        |    |    |                |
| CD18           | Forward: AACTGGCCGAAAGCAACAT        | 64 | 58 | U13941.1       |
|                | Reverse: CACACGTTTTTCACCATTTTCTTGGT |    |    |                |
| iNOS           | Forward: CAGCGGGATGACTTTCCAA        | 60 | 58 | NM_001143690.1 |

---

---

|                    |                                    |     |    |                |
|--------------------|------------------------------------|-----|----|----------------|
|                    | Reverse: TTGCAAGCAAGATCCCCTTT      |     |    |                |
| Hepcidin           | Forward: CGGCTGCTGTCGCAAAG         | 57  | 58 | AF516143.1     |
|                    | Reverse: GGTGGGCAGCTCTACGTCTT      |     |    |                |
| LEAP2              | Forward: CATCCCCCCTCAATCAAG        | 59  | 58 | AF516144.1     |
|                    | Reverse: GGCAGATGACGAGTACTGCAA     |     |    |                |
| $\beta$ -defensin1 | Forward: GCTTAAGGAATAAAGGCGTGTGTAT | 62  | 58 | NM_213838.1    |
|                    | Reverse: GCCGATCTGTTTCATCTTTGG     |     |    |                |
| STAT2              | Forward: TGCCTCAAACCTCCACATCGA     | 65  | 58 | AB004061.1     |
|                    | Reverse: CCTTGTTCCGGACAGTGAACCTG   |     |    |                |
| STAT3              | Forward: AGCCTCTCCGCAGAGTTCAA      | 60  | 58 | NM_001044580.1 |
|                    | Reverse: GCCCCCGTTCCACAT           |     |    |                |
| JAK2               | Forward: CCCAAAGCCAAAAGATAAGTCAA   | 76  | 58 | AB00601        |
|                    | Reverse: TGTTGGTGAGGTTGGCACAT      |     |    |                |
| NF- $\kappa$ B P65 | Forward: CGAGAGGAGCACGGATACCA      | 60  | 58 | EU399817.1     |
|                    | Reverse: CCCGTGTAGCCATTGATCTTG     |     |    |                |
| mTOR               | Forward: CAGGCATACGGTCGAGACTTAA    | 116 | 58 | XM_013998977.1 |

---

---

Reverse: CGCCTGAACACGTGGTAATAGA

Reverse: GATCCCATGGCTGGTCCTTT

---

TNF- $\alpha$ , tumor necrosis factor  $\alpha$ ; IgM, immunoglobulin M; TGF- $\beta$ 1, transforming growth factor  $\beta$ 1; CD8, cluster of differentiation 8; CD11, lymphocyte function-associated antigen 1; CD18, integrin beta-2; iNOS, inducible nitric oxide synthase; LEAP2, liver-expressed antimicrobial peptide 2; STAT2, signal transducer and activator of transcription 2; STAT3, signal transducer and activator of transcription 3; JAK2, Janus kinase 2; NF- $\kappa$ B P65, nuclear factor-kappa B P65; S6K1, ribosomal protein S6 kinase 1; 4EBP1, eukaryotic IF4E-binding protein 1; mTOR, mammalian target of rapamycin.

**TABLE S3** | Primer sequences of primers and probes for intestinal bacteria

| Genes                   | Primer sequence (5'-3')                                                                                          | Product (bp) | Annealing temperature (°C) | Reference.      |
|-------------------------|------------------------------------------------------------------------------------------------------------------|--------------|----------------------------|-----------------|
| Total bacteria          | Forward: ACTCCTACGGGAGGCAGCAG<br>Reverse: ATTACCGCGGCTGCTGG                                                      | 200          | 60                         |                 |
| <i>Lactobacillus</i>    | Forward: GAGGCAGCAGTAGGGAATCTTC<br>Reverse: CAACAGTTACTCTGACACCCGTTCTTC<br>Probe AAGAAGGGTTTCGGCTCGTAAAACCTCTGTT | 126          | 60                         |                 |
| <i>Bifidobacterium</i>  | Forward: CGCGTCCGGTGTGAAAG<br>Reverse: CTTCCCGATATCTACACATTCCA<br>Probe ATTCCACCGTTACACCGGGAA                    | 121          | 60                         | Chen et al.[35] |
| <i>Escherichia coli</i> | Forward: CATGCCGCGTGTATGAAGAA<br>Reverse: CGGGTAACGTCAATGAGCAAA<br>Probe AGGTATTAACCTTACTCCCTTCCTC               | 96           | 60                         |                 |

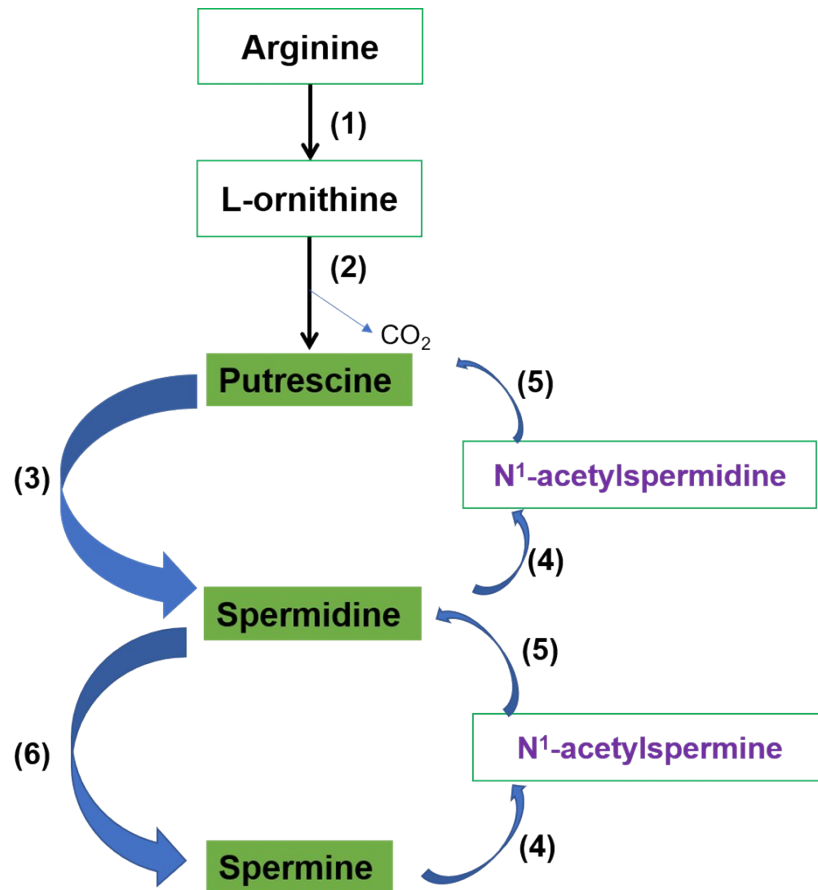

Fig S1 polyamine metabolism pathway. Notes: (1) Arginase; (2) Ornithine decarboxylase; (3) Spermidine synthase; (4) Spermidine/spermine N<sup>1</sup>-acetyltransferase; (5) Polyamine oxidase; (6) Spermine synthase
